# Supplementary material for: Genomic variants reveal differential evolutionary constraints on human transglutaminases and point towards unrecognized significance of transglutaminase 2
Source: PubMed Central journal article supplement (PMC5332030; doi:10.1371/journal.pone.0172189), 2017-03-01
Supplement: pone.0172189.s001.pdf [file pone.0172189.s001.pdf]

**S1 Table**

|             | Sequence-based prediction                     |      |      |           |                                             |      |      |           |                  | Structure-based prediction                      |                     |
|-------------|-----------------------------------------------|------|------|-----------|---------------------------------------------|------|------|-----------|------------------|-------------------------------------------------|---------------------|
|             | Probability values for wild type residues (%) |      |      |           | Probability values for mutated residues (%) |      |      |           | sec. str. change | Stability values ( $\Delta\Delta G$ , kcal/mol) |                     |
| Mutation    | H                                             | E    | C    | sec. str. | H                                           | E    | C    | sec. str. |                  |                                                 | opened conformation |
| p.Leu12Pro* | 60.8                                          | 16.6 | 22.6 | H         | 38.4                                        | 3.6  | 58   | C         | H→C              | 0.29                                            | -                   |
| p.Arg214His | 4.8                                           | 13.2 | 82.0 | C         | 3.2                                         | 9.1  | 87.7 | C         | -                | 2.32                                            | 2.37                |
| p.Val220Met | 2.6                                           | 87.8 | 9.6  | E         | 11.1                                        | 76.8 | 12.1 | E         | -                | -0.17                                           | -1.33               |
| p.Val272Ile | 0.4                                           | 81.0 | 18.6 | E         | 0.4                                         | 82.5 | 17.1 | E         | -                | -0.38                                           | -0.29               |
| p.Val283Met | 3.0                                           | 40.0 | 56.9 | C         | 4.5                                         | 23.9 | 71.6 | C         | -                | 5.46                                            | 0.13                |
| p.Trp337Leu | 0.4                                           | 90.1 | 9.5  | E         | 0.2                                         | 94.2 | 5.6  | E         | -                | 1.74                                            | 2.25                |
| p.Arg377His | 14.6                                          | 53.7 | 31.7 | E         | 9.3                                         | 47.0 | 43.7 | E         | -                | 0.84                                            | 1.35                |
| p.Val431Leu | 21.0                                          | 24.2 | 54.8 | C         | 26.6                                        | 14.2 | 59.3 | C         | -                | 0.97                                            | 0.52                |
