# Supplementary material for: Genomic variants reveal differential evolutionary constraints on human transglutaminases and point towards unrecognized significance of transglutaminase 2
Source: PubMed Central journal article supplement (PMC5332030; doi:10.1371/journal.pone.0172189), 2017-03-01
Supplement: pone.0172189.s002.pdf [file pone.0172189.s002.pdf]

**S2 Table**

| <b>Gene</b> | <b>Icelandic population</b>       | <b>British Pakistani</b> | <b>Autism spectrum disorders cases</b> | <b>Atherosclerosis Risk in Communities (ARIC)</b>       | <b>Exome Aggregation Consortium subjects (ExAC)</b>                                |
|-------------|-----------------------------------|--------------------------|----------------------------------------|---------------------------------------------------------|------------------------------------------------------------------------------------|
| F13a        | -                                 | -                        | -                                      | 1 frameshift; 1 splicing; 1 stop gained (4 individuals) | 7 stop gained; 4 splice donor; 3 splice acceptor; 8 frameshift<br>Allele count: 86 |
| TGM1        | 1 splice acceptor (2 individuals) | -                        | -                                      | 1 frameshift; 1 splicing; 2 stop gained (8 individuals) | 10 stop gained; 2 splice donor; 3 splice acceptor; 4 frameshift; Allele count: 66  |
| TGM2        | -                                 | -                        | -                                      | 2 stop gained (4 individuals)                           | 13 stop gained; 2 splice donor; 6 splice acceptor; 8 frameshift; Allele count: 54  |
| TGM3        | 1 stop gained                     | -                        | -                                      | 2 frameshift; 1 splicing; 1 stop gained (4 individuals) | 7 stop gained; 1 splice donor; 3 splice acceptor; 9 frameshift<br>Allele count: 27 |

|      |                                                       |               |                                      |                                                                                  |                                                                                                                  |
|------|-------------------------------------------------------|---------------|--------------------------------------|----------------------------------------------------------------------------------|------------------------------------------------------------------------------------------------------------------|
| TGM4 | 1 stop gained<br>(9 individuals)                      | 1 Stop gained | 1 Stop gained<br>(1 individual case) | 2 frameshift; 1 splicing<br>5 stop gained<br>(129 individuals;<br>1 homozygote ) | 14 stop gained;<br>10 splice donor; 0 splice acceptor;<br>15 frameshift;<br>Allele count: 1179; (11 homozygotes) |
| TGM5 | 1 stop gained<br>1 splice acceptor<br>(3 individuals) | -             | -                                    | 3 frameshift; 1 splicing; 3 frameshift (8 individuals)                           | 11 stop gained; 10 splice donor; 3 splice acceptor;<br>16 frameshift;<br>Allele count: 85                        |
| TGM6 | 1 stop gained<br>1 splice acceptor                    | -             | -                                    | 3 frameshift; 3 stop gained<br>(11 individuals)                                  | 13 stop gained;<br>10 splice donor; 5 splice acceptor;<br>11 frameshift;<br>Allele count: 237;<br>(1 homozygote) |
| TGM7 | -                                                     | -             | -                                    | 2 frameshift; 3 splicing; 1 stop gained (21 individuals)                         | 10 stop gained; 5 splice donor; 3 splice acceptor;<br>10 frameshift;<br>Allele count: 74                         |
