# Supplementary material for: Genomic variants reveal differential evolutionary constraints on human transglutaminases and point towards unrecognized significance of transglutaminase 2
Source: PubMed Central journal article supplement (PMC5332030; doi:10.1371/journal.pone.0172189), 2017-03-01
Supplement: pone.0172189.s003.pdf [file pone.0172189.s003.pdf]

**S3 Table**

| <b>F13a</b>                     | <b>TGM1</b>                 |                             | <b>TGM5</b>                  | <b>TGM6</b>    |
|---------------------------------|-----------------------------|-----------------------------|------------------------------|----------------|
| g.210_211del,<br>(homozygous)   | c.4640del<br>(homozygous)   | p.Asn288Thr                 | p.Gly113Cys<br>(homozygous)  | p.Leu517Trp    |
| p.Arg681His<br>(homozygous)     | g.3366A>G<br>(homozygous)   | p.Arg306Trp                 | p.Lys445Asn<br>(homozygous)  | p.Asp327Gly    |
| p.Arg171Ter                     | p.Ser42Tyr                  | p.Gly217Ser                 | p.Trp255Arg                  | p.Asp510His    |
| p.Tyr441Ter                     | p.Arg142Cys                 | g.1303_1307del              | p.Leu41Pro                   | p.Arg111Cys    |
| p.Asn60Lys                      | p.Arg323Gln                 | p.Gln582Ter                 | c.640del                     | c.1722_1724del |
| p.Gly501Arg                     | p.Arg141His<br>(homozygous) | g.86C>T                     | c.1811_1815delinsT<br>CCTTCA |                |
| p.Gly562Arg<br>(homozygous)     | p.Arg142His<br>(homozygous) | p.Asp101Val                 |                              |                |
| p.Val414Phe<br>(homozygous)     | p.Val378Leu                 | p.Leu204Gln                 |                              |                |
| p.Arg260His<br>(homozygous)     | p.Arg395Leu                 | p.Tyr276Asn<br>(homozygous) |                              |                |
| p.Val34Leu<br>(homozygous)      | p.Val382Met<br>(homozygous) | p.Arg126Cys                 |                              |                |
| p.Arg326Gln                     | p.Arg388His                 | p.Arg315Cys                 |                              |                |
| p.Val316Phe                     | g.9008del                   | p.Arg315His<br>(homozygous) |                              |                |
| p.Tyr283Cys                     | p.Asp490Gly                 | p.Arg315Leu<br>(homozygous) |                              |                |
| c.1286_1287insC<br>(homozygous) | p.Gly278Arg                 | p.Val359Met                 |                              |                |
| g.[5G>A;15C>T]                  | p.Gly392Asp                 | p.Arg396His                 |                              |                |
| p.Arg703Trp                     | p.Arg142Pro                 | g.1922_1928del              |                              |                |
| p.Arg661Ter                     | p.Arg286Gln                 | g.1331_1332insA             |                              |                |
| p.Met242Thr                     | p.Val518Met                 | p.Arg670Ter<br>(homozygous) |                              |                |
| c.602_605del                    | p.Ser160Cys                 | g.1223_1227del              |                              |                |
| n.1+12C>A                       | p.Gly94Asp                  |                             |                              |                |
